# Supplementary material
Source: MDPI journal article supplement (https://www.mdpi.com/2075-5309/11/5/202)
Supplement: s1 [file s1]

## Supplementary information: A Framework for Developing Green Building Rating Tools based on Pakistan's Local Context

**Table S1:** Background and Experience of Respondents

| <b>Interviewee #</b> | <b>Work or research experience for sustainable development of a building (yes/no)</b> | <b>Experience/ certification in projects related to sustainable building development</b> | <b>Name of the building</b>                          | <b>Green building rating star</b> | <b>Role in the SEED or building sustainable development</b>                                        |
|----------------------|---------------------------------------------------------------------------------------|------------------------------------------------------------------------------------------|------------------------------------------------------|-----------------------------------|----------------------------------------------------------------------------------------------------|
| <b>1.</b>            | Yes                                                                                   | US Department of Energy certified                                                        | Telenor headquarter                                  | SEED                              | Involved in the development of SEED and the development of the Pakistan Green building guidelines. |
| <b>2.</b>            | Yes                                                                                   | 8 to 10 buildings/ Certified with LEED and Dialux                                        | World Bank Islamabad Headquarter                     | SEED Platinum rated               | involved in the construction and planning of the building                                          |
| <b>3.</b>            | Yes                                                                                   | LEED training                                                                            | Canadian home buildings                              | LEED gold standard                | focused on making sustainable dwellings and commercial buildings                                   |
| <b>4.</b>            | Yes                                                                                   | LEED certification                                                                       | Mosque In Karachi                                    | SEED                              | involved in the development of the rating tool and was involved in the awareness of the tool       |
| <b>5.</b>            | yes                                                                                   | LEED certification                                                                       | CITI Bank Lahore                                     | LEED                              | Involved in LEED projects and green building projects                                              |
| <b>6.</b>            | Yes                                                                                   | LEED AP                                                                                  | CitiBank Karachi, Citi Bank Islamabad, and Citi Bank | LEED                              | involved in around 20 LEED projects or green building projects                                     |

|     |     |                                                 |                                                                                                                                                                            |                 |                                                                                                                  |
|-----|-----|-------------------------------------------------|----------------------------------------------------------------------------------------------------------------------------------------------------------------------------|-----------------|------------------------------------------------------------------------------------------------------------------|
|     |     |                                                 | Lahore, Sapphire,<br>interloop socks                                                                                                                                       |                 |                                                                                                                  |
| 7.  | Yes | Project coordinator/<br>LEED Knowledge          | NA                                                                                                                                                                         | LEED            | Research on the use of building information<br>modelling or sustainability assessment of<br>residential projects |
| 8.  | Yes | 10 projects<br>experience/LEED<br>Certification | Citibank Lahore,<br>Islamabad, Unilever<br>office in Karachi,<br>Interloop Sadaqat ltd<br>in Faisalabad, Care<br>hospital, Askari<br>Towers corporate<br>office in Lahore. | SEED            | Development of the SEED rating system.                                                                           |
| 9.  | yes | LEED Green AP                                   | house in DHA                                                                                                                                                               | SEED            | Involved in Development of SEED                                                                                  |
| 10. | yes | 6 projects/ LEED<br>certification               | Nill                                                                                                                                                                       | LEED            | involved in the projects which require the<br>certification of sustainable solutions                             |
| 11. | yes | 4 projects/ LEED<br>AP, Well AP                 | ENCC headquarters                                                                                                                                                          | Gold level LEED | Involved in three green building rating<br>systems.                                                              |
| 12. | yes | 3 projects/ LEED<br>certification               | Sadaqat ltd                                                                                                                                                                | SEED            | Involved in the rating of the building with<br>the SEED green building rating tool.                              |
| 13. | Yes | 10 projects/ LEED<br>AP                         | Houses in Bahria<br>Town Karachi                                                                                                                                           | LEED            | Involved in LEED certification of the<br>buildings                                                               |
| 14. | Yes | Nill                                            | Bank Alflah Lahore                                                                                                                                                         | LEED            | involved in energy auditing of the building                                                                      |
| 15. | Yes | Nill                                            | Nill                                                                                                                                                                       | Nill            | research on green building practices in<br>Pakistan                                                              |
| 16. | Yes | SEED certification                              | Sapphire, National<br>Foods. SECA,<br>interloop                                                                                                                            | SEED            | involved in sustainable projects                                                                                 |
| 17. | Yes | SEED certified                                  | DCK Mall, Karachi                                                                                                                                                          | SEED            | involved in energy auditing of a building                                                                        |

|     |                         |                                             |                                 |               |                                                                                            |
|-----|-------------------------|---------------------------------------------|---------------------------------|---------------|--------------------------------------------------------------------------------------------|
| 18. | Yes, conducted research | Research on many projects/ No certification | KFC Chiniot building            | LEED and SEED | conducted research on buildings and how to plan a sustainable or energy-efficient building |
| 19. | yes                     | 2 projects / SEED certification             | National Foods                  | SEED          | Involved in the development of the rating tool                                             |
| 20. | yes                     | SEED certification                          | Askari Towers corporate         | SEED          | Involved in the project for the SEED certification                                         |
| 21. | Yes                     | SEED certified                              | Sapphire                        | SEED          | Involved in the development of SEED                                                        |
| 22. | Yes                     | SEED certification                          | Unilever office in Karachi      | SEED          | Development of the SEED rating system                                                      |
| 23. | yes                     | SEED certification                          | Care Hospital                   | SEED          | Involved in the sustainable development of the building                                    |
| 24. | yes                     | 5 projects/LEED and SEED certified          | Sapphire                        | SEED          | involved in sustainable projects                                                           |
| 25. | yes                     | SEED and LEED certification                 | Bahria Town Grand Mosque Lahore | SEED          | Involved in SEED and LEED certification of the buildings                                   |

**Table S2:** Indicators refined after stakeholder consultation

| Dimensions of sustainability | Indicators           | Assessment stage of building life cycle                  | Indicators Added/Refined/ Omitted                                              |
|------------------------------|----------------------|----------------------------------------------------------|--------------------------------------------------------------------------------|
| <b>Environment</b>           | Sustainable sites    | Design                                                   | Refined to “protection of cultural heritage” and move under cultural dimension |
|                              | Land Use & ecology   | Design                                                   | Refined to “Land use”                                                          |
|                              | Energy & Atmosphere  | Design, Construction, Operation & Renovation             | Retained                                                                       |
|                              | Material & resources | Design, Construction, Operation & Renovation             | Retained                                                                       |
|                              | Water conservation   | Design, Construction, Operation & Renovation             | Refined to “water conservation”                                                |
|                              | Emissions            | Design, Construction, Operation, Renovation & Demolition | Retained                                                                       |
|                              | Waste                | Design, Construction, Operation, Renovation & Demolition | Refined to “waste management”                                                  |
| <b>Economic</b>              | Life Cycle Costing   | Design, Construction, Operation, Renovation & Demolition | Omitted and included in “Investment cost”                                      |
|                              | Professional fees’   | Design, Construction, Operation, Renovation & Demolition | Omitted                                                                        |
|                              | Employment           | Design, Construction, Operation, Renovation & Demolition | Retained                                                                       |
|                              | Flexibility          | Design, Construction, Operation, Renovation & Demolition | Added                                                                          |
|                              | Investment cost      | Construction, Operation, & Renovation                    | Added                                                                          |
| <b>Social</b>                | Health & Wellbeing   | Construction, Operation, Renovation & Demolition         | Retained                                                                       |

|                   |                                         |                                                          |          |
|-------------------|-----------------------------------------|----------------------------------------------------------|----------|
|                   | Location & Transportation               | Design, Construction, Operation, Renovation & Demolition | Retained |
|                   | Regional Priority                       | Design, Construction, Operation, Renovation & Demolition | Omitted  |
|                   | Aesthetic Quality                       | Design, Construction, Operation, & Renovation            | Retained |
|                   | Indoor Air Quality.                     | Design, Construction, Operation, & Renovation            | Retained |
|                   | Education and awareness                 | Design, Construction, Operation, Renovation & Demolition | Retained |
|                   | Acoustics                               | Design, Construction, Operation, Renovation & Demolition | Added    |
|                   | Safety and security                     | Design, Construction, Operation, Renovation & Demolition | Added    |
|                   |                                         |                                                          |          |
| <b>Culture</b>    | Artistic creation                       | Design, construction & Renovation                        | Omitted  |
|                   | Protection of cultural heritage'        | Design                                                   | Retained |
|                   | Cultural Identity                       | Design, Construction, Operation, Renovation              | Added    |
| <b>Government</b> | Management                              | Design, Construction, Operation, Renovation & Demolition | Retained |
|                   | Resilience (adaptation and mitigation)' | Design, Construction, Operation, Renovation & Demolition | Retained |
|                   | Policies & Regulations                  | Design, Construction, Operation, Renovation & Demolition | Added    |
|                   | Enforcement                             | Design, Construction, Operation, Renovation & Demolition | Added    |
